# Supplementary material for: Sulfur vacancy-tailored NiCo2S4 nanosheet arrays for the hydrogen evolution reaction at all pH values
Source: Royal Society of Chemistry journal article supplement (doi:10.1039/c9cy02189b), 2019-12-16
Supplement: c9cy02189b1.pdf [file c9cy02189b1.pdf]

## Supporting Information

### **Sulfur Vacancies-Tailored NiCo<sub>2</sub>S<sub>4</sub> Nanosheet Arrays for Hydrogen Evolution Reaction at All pH Values**

Xiaoliang Guo,<sup>a,b</sup> Zhiming Liu,<sup>a,b</sup> Fang Liu,<sup>a,b</sup> Jun Zhang,<sup>\*,a,b</sup> Lekai Zheng,<sup>a,b</sup>  
Yongchuan Hu,<sup>a,b</sup> Jing Mao,<sup>c</sup> Hui Liu,<sup>\*,a</sup> Yanming Xue,<sup>a,b</sup> Chengchun Tang<sup>a,b</sup>

<sup>a</sup>School of Material Science and Engineering, Hebei University of Technology,  
Dingzigu Road 1, Tianjin 300130, P. R. China

<sup>b</sup>Hebei Key Laboratory of Boron Nitride Micro and Nano Materials, Guangrongdao  
Road 29, Tianjin 300130, P. R. China

<sup>c</sup>School of Materials Science and Engineering, Tianjin University, Tianjin Haihe  
Education Park, Tianjin 300072, P. R. China

Electronic Supplementary Information (ESI) available. See DOI: 10.1039/x0xx00000x

**E-mail address:** junnano@gmail.com (J. Zhang), liuhuihebut@163.com (H. Liu)

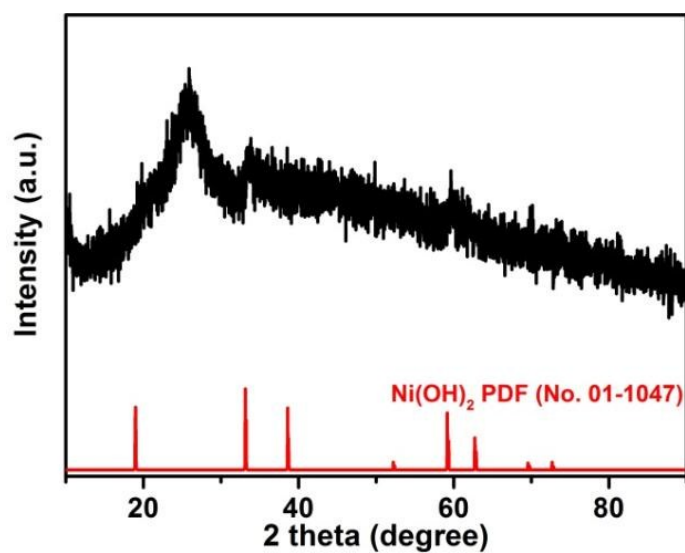

**Figure S1.** XRD pattern of NiCo hydroxide nanosheet arrays precursors on carbon cloth.

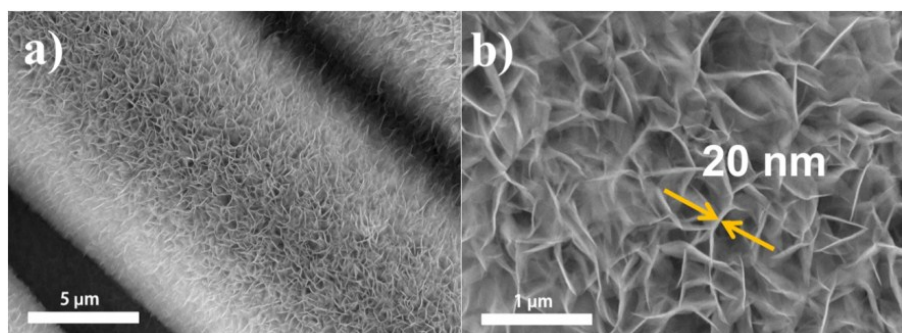

**Figure S2.** SEM of NiCo hydroxide nanosheet arrays precursors on carbon cloth.

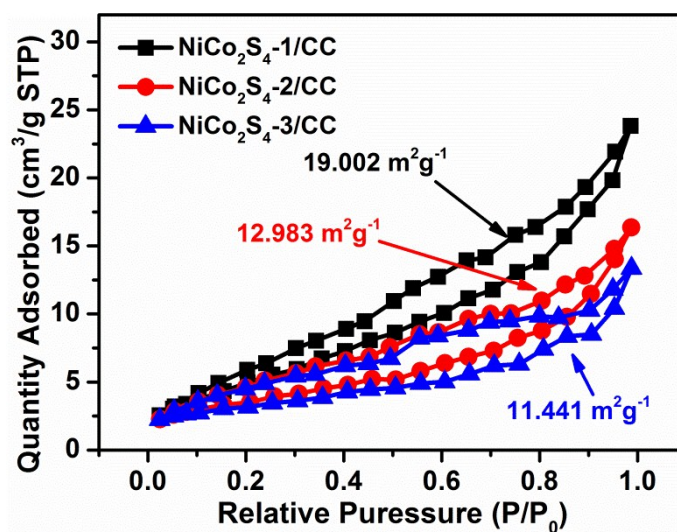

**Figure S3.** Nitrogen adsorption-desorption isotherms curve of NiCo<sub>2</sub>S<sub>4</sub>-1/CC, NiCo<sub>2</sub>S<sub>4</sub>-2/CC and NiCo<sub>2</sub>S<sub>4</sub>-3/CC.

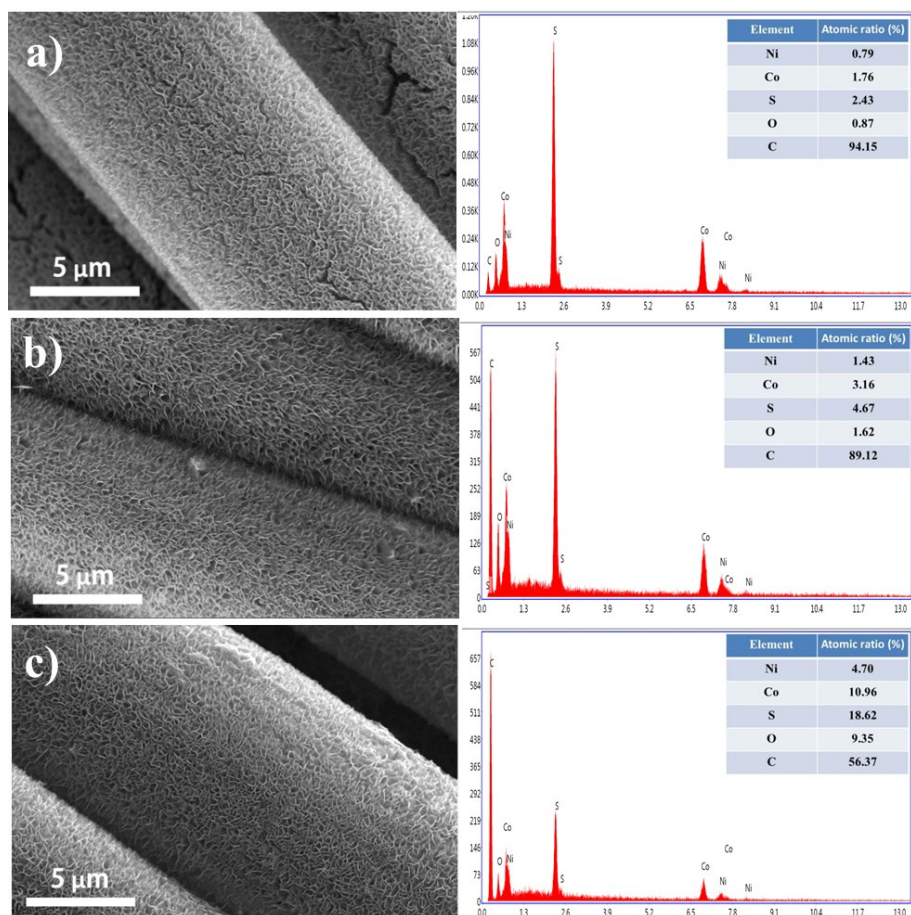

**Figure S4.** SEM and corresponding EDS for a) NiCo<sub>2</sub>S<sub>4</sub>-1/CC, b) NiCo<sub>2</sub>S<sub>4</sub>-2/CC and c) NiCo<sub>2</sub>S<sub>4</sub>-3/CC.

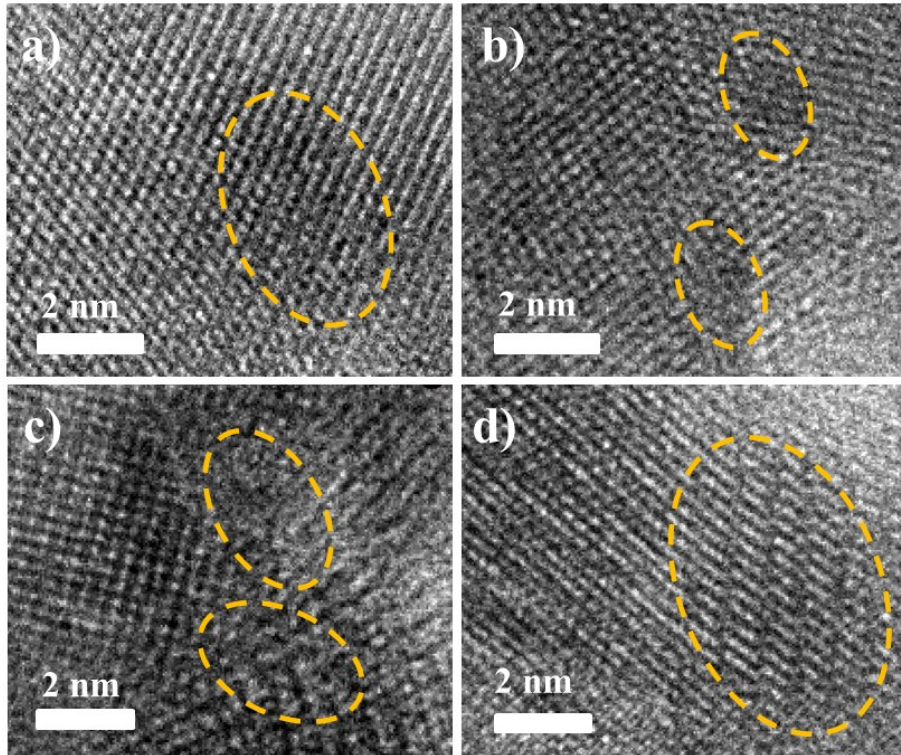

Figure S5. HETEM images of NiCo<sub>2</sub>S<sub>4</sub>-2/CC (a-d)

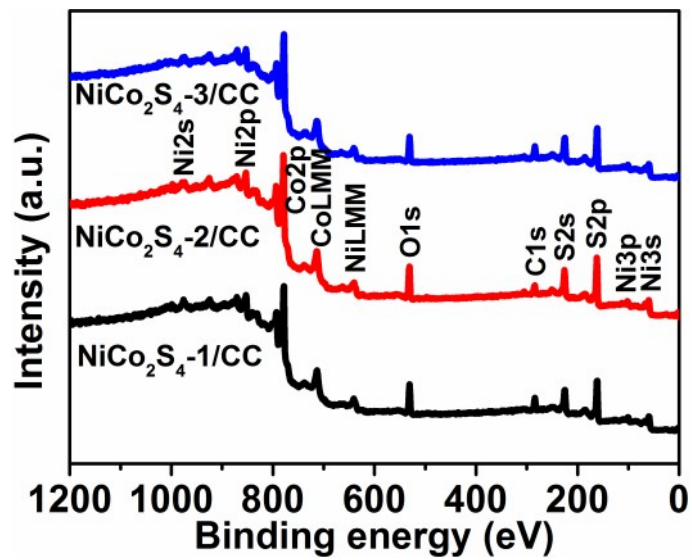

Figure S6. XPS spectra of three samples.

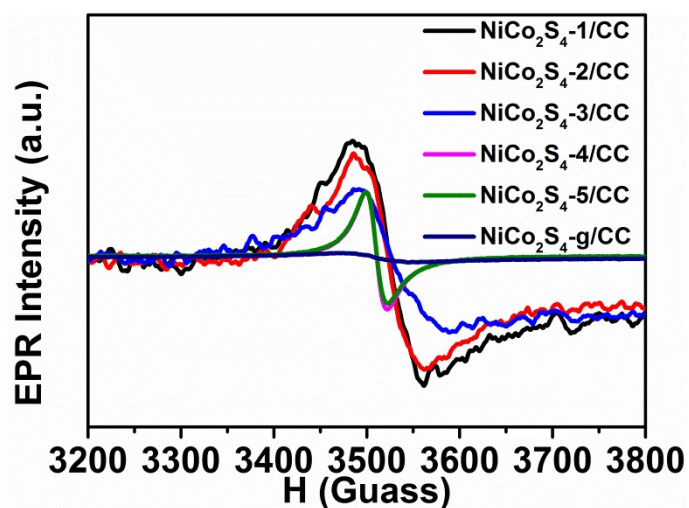

**Figure S7.** EPR curves of NiCo<sub>2</sub>S<sub>4</sub>-1/CC, NiCo<sub>2</sub>S<sub>4</sub>-2/CC, NiCo<sub>2</sub>S<sub>4</sub>-3/CC, NiCo<sub>2</sub>S<sub>4</sub>-4/CC, NiCo<sub>2</sub>S<sub>4</sub>-5/CC and NiCo<sub>2</sub>S<sub>4</sub>-g/CC.

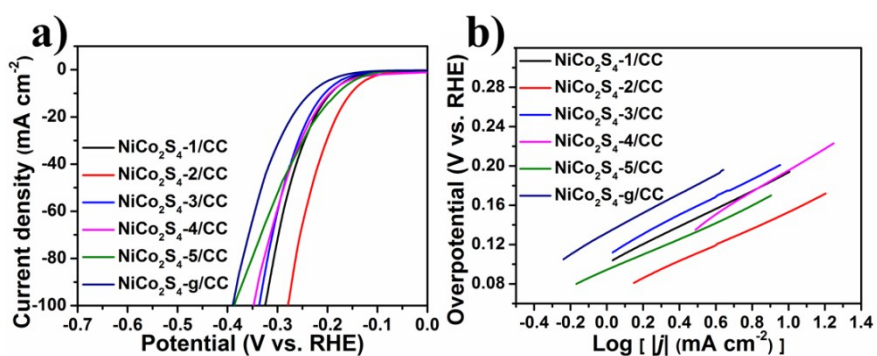

**Figure S8.** a) LSV and Tafel curves b) of NiCo<sub>2</sub>S<sub>4</sub>-1/CC, NiCo<sub>2</sub>S<sub>4</sub>-2/CC, NiCo<sub>2</sub>S<sub>4</sub>-3/CC, NiCo<sub>2</sub>S<sub>4</sub>-4/CC, NiCo<sub>2</sub>S<sub>4</sub>-5/CC and NiCo<sub>2</sub>S<sub>4</sub>-g/CC.



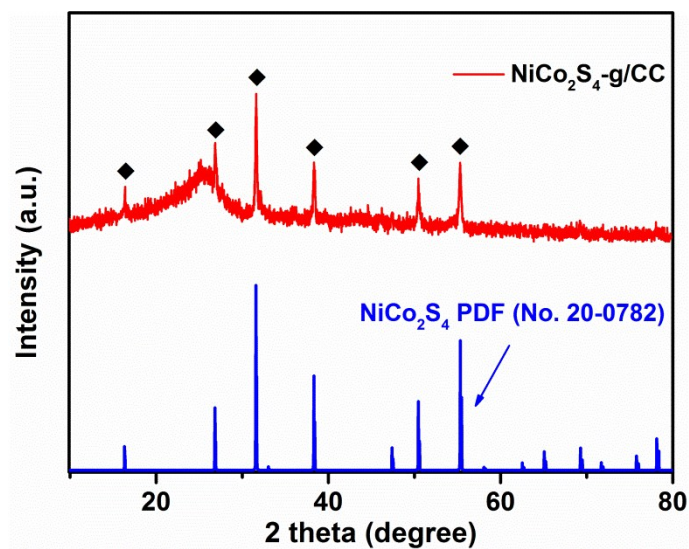

Figure S9. XRD pattern of NiCo<sub>2</sub>S<sub>4</sub>-g/CC.

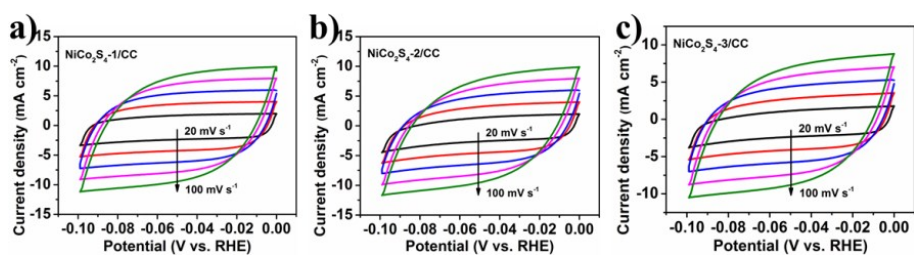

Figure S10. Voltammograms of a) NiCo<sub>2</sub>S<sub>4</sub>-1/CC, b) NiCo<sub>2</sub>S<sub>4</sub>-2/CC and c) NiCo<sub>2</sub>S<sub>4</sub>-3/CC recording at the scan rates of 20, 40, 60, 80, and 100 mV s<sup>-1</sup> in 1M KOH.

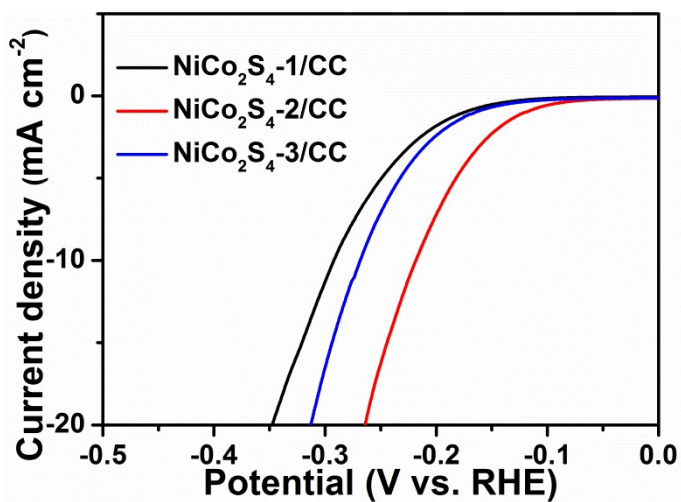

Figure S11. LSV curves of NiCo<sub>2</sub>S<sub>4</sub>-1/CC, NiCo<sub>2</sub>S<sub>4</sub>-1/CC and NiCo<sub>2</sub>S<sub>4</sub>-3/CC normalized by special surface area.

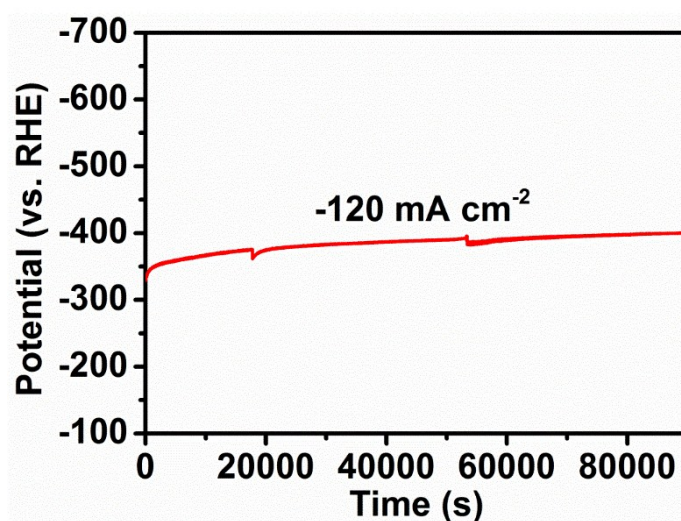

**Figure S12.** Durability measurement of NiCo<sub>2</sub>S<sub>4</sub>-2/CC with a continuous current density of -120 mA cm<sup>-2</sup>.

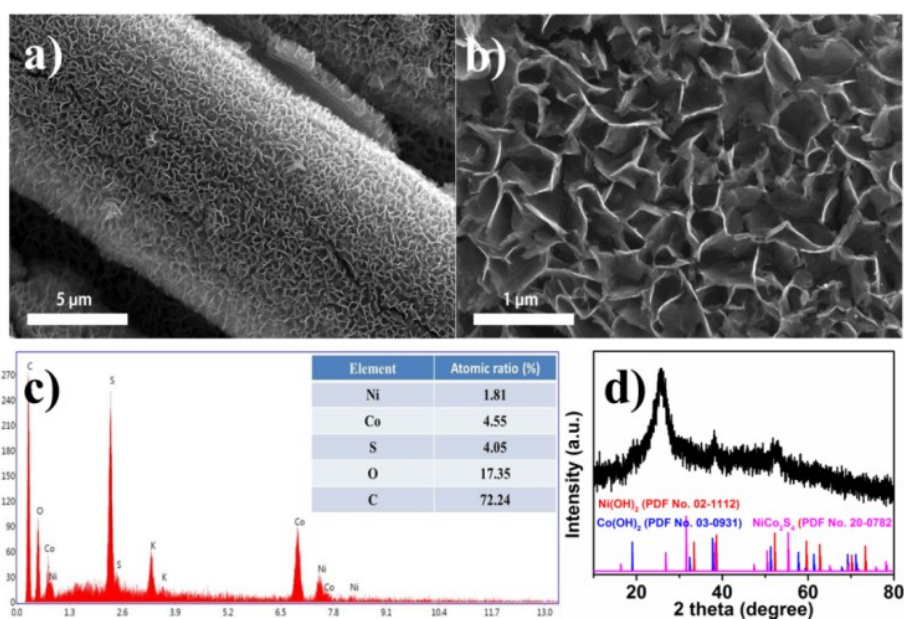

**Figure S13.** a-b) SEM images of NiCo<sub>2</sub>S<sub>4</sub>-2/CC electrode after 36000 s durability measurement. c) Corresponding EDS spectrum. d) XRD pattern of NiCo<sub>2</sub>S<sub>4</sub>-2/CC electrocatalyst after 36000 s stable test.

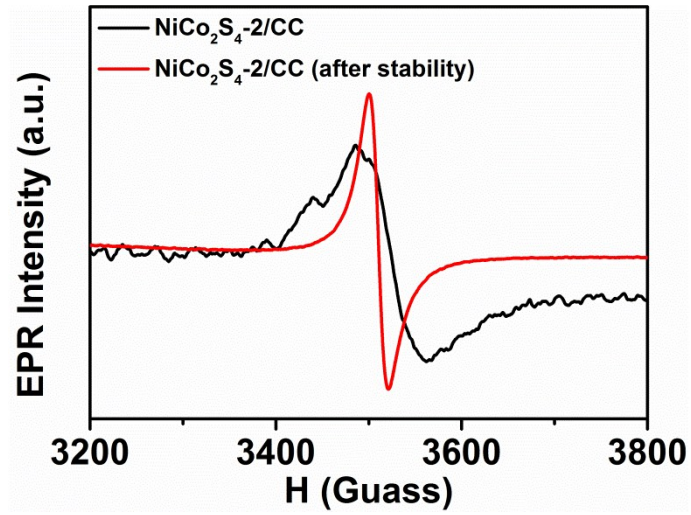

Figure S14. EPR curve after 10 h of continuous test.

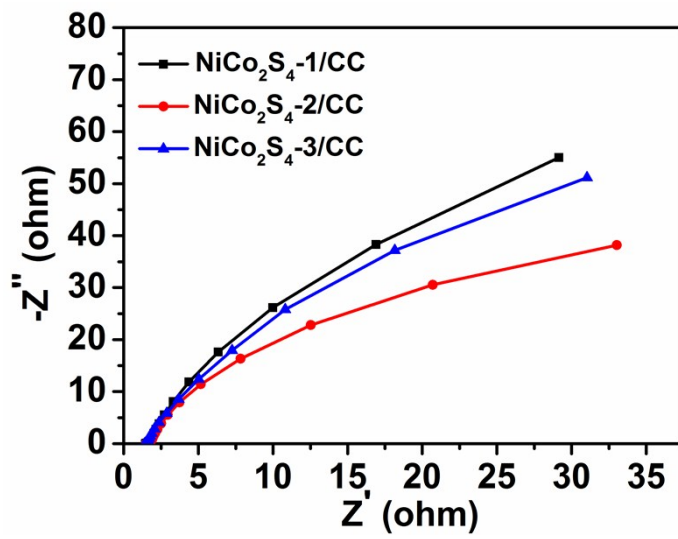

Figure S15. Nyquist plots of NiCo<sub>2</sub>S<sub>4</sub>-1/CC, NiCo<sub>2</sub>S<sub>4</sub>-2/CC, and NiCo<sub>2</sub>S<sub>4</sub>-3/CC in 0.5 M H<sub>2</sub>SO<sub>4</sub>.



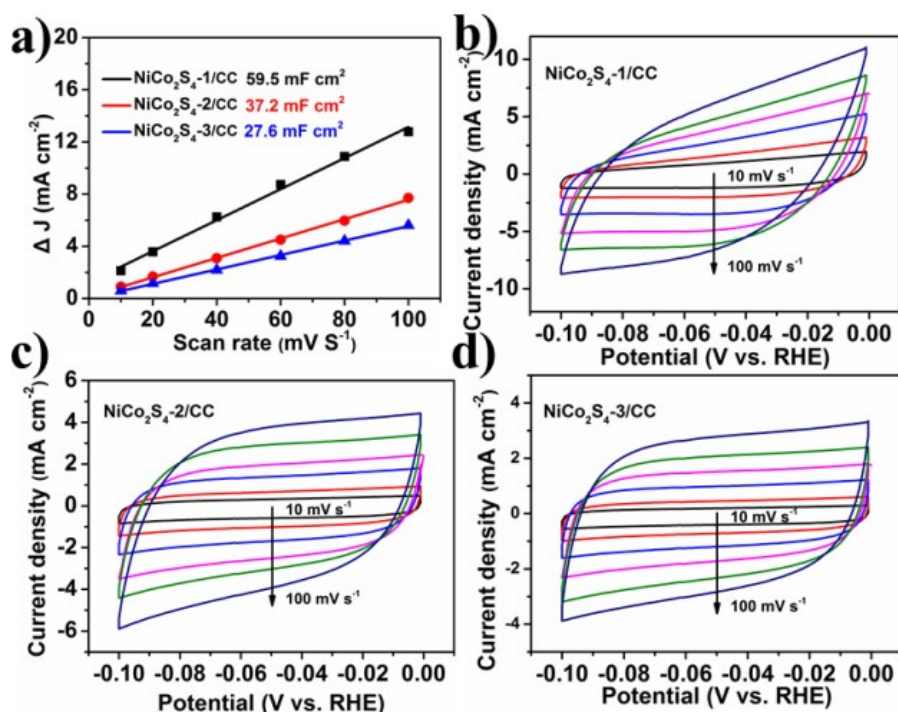

**Figure S16.**  $C_{dl}$  (a) and different cyclic voltammograms of NiCo<sub>2</sub>S<sub>4</sub>-1/CC (b), NiCo<sub>2</sub>S<sub>4</sub>-2/CC (c) and NiCo<sub>2</sub>S<sub>4</sub>-3/CC (d) in 0.5 M H<sub>2</sub>SO<sub>4</sub>

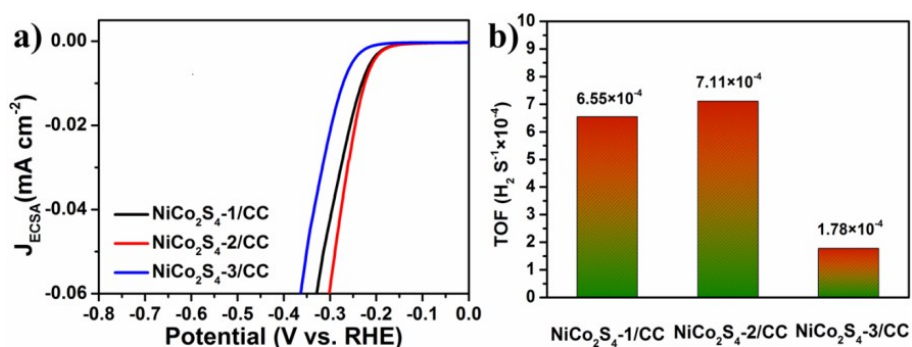

**Figure S17.** a) Polarization curves of as-prepared samples normalized by ECSA in 0.5 M H<sub>2</sub>SO<sub>4</sub>, b) Calculated TOF value at overpotential of -200 mV in 0.5 M H<sub>2</sub>SO<sub>4</sub>.

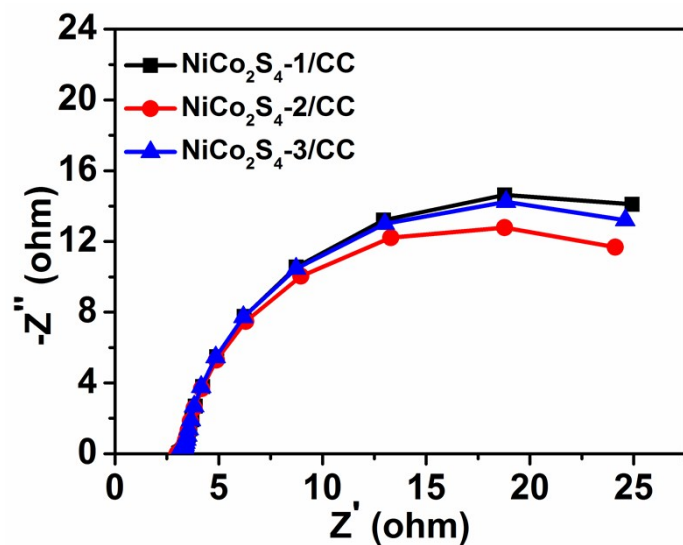

**Figure S18.** Nyquist plots of NiCo<sub>2</sub>S<sub>4</sub>-1/CC, NiCo<sub>2</sub>S<sub>4</sub>-2/CC, and NiCo<sub>2</sub>S<sub>4</sub>-3/CC in 1 M PBS.

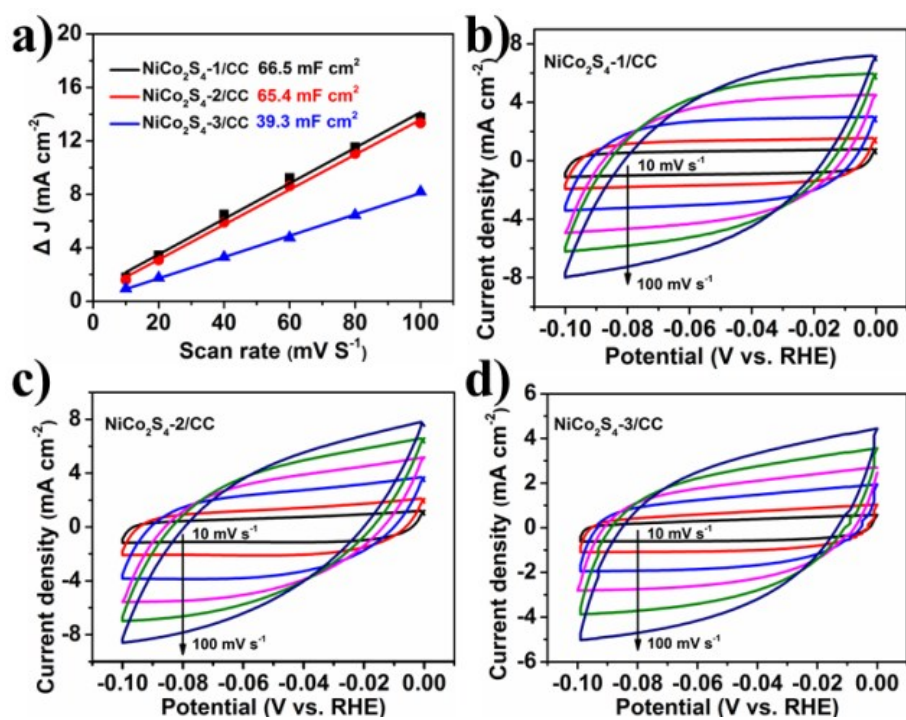

**Figure S19.**  $C_{dl}$  (a) and different cyclic voltammograms of NiCo<sub>2</sub>S<sub>4</sub>-1/CC (b), NiCo<sub>2</sub>S<sub>4</sub>-2/CC (c) and NiCo<sub>2</sub>S<sub>4</sub>-3/CC (d) in 1 M PBS.

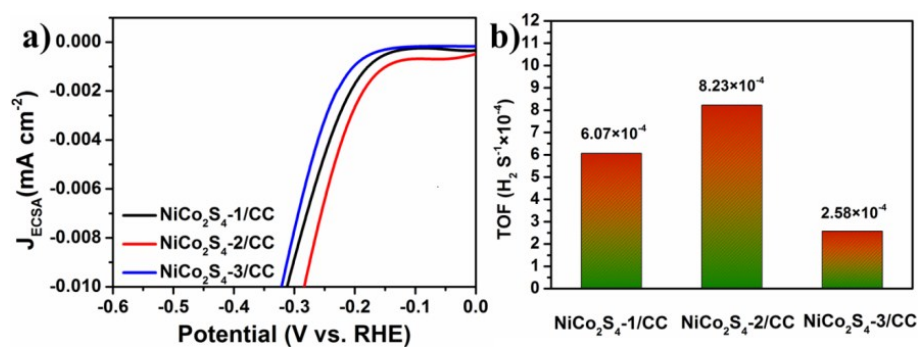

**Figure S20.** a) Polarization curves of as-prepared samples normalized by ECSA in 0.5 M H<sub>2</sub>SO<sub>4</sub>, b) Calculated TOF value at overpotential of -200 mV in 1 M PBS.

**Table S1.** EDS and ICP-OES results of Ni, Co and S in NiCo<sub>2</sub>S<sub>4</sub>.

|                                        | EDS<br>(Ni: Co: S)<br>molar ratio | ICP<br>(Ni: Co: S)<br>molar ratio | NiCo <sub>2</sub> S <sub>4</sub><br>(Ni/Co: S by ICP)<br>molar ratio |
|----------------------------------------|-----------------------------------|-----------------------------------|----------------------------------------------------------------------|
| NiCo <sub>2</sub> S <sub>4</sub> -1/CC | 0.79:1.76:2.43                    | 0.82:1.72:2.46                    | 1:2.09:3.0                                                           |
| NiCo <sub>2</sub> S <sub>4</sub> -2/CC | 1.43:3.16:4.67                    | 0.61:1.40:2.13                    | 1:2.29:3.5                                                           |
| NiCo <sub>2</sub> S <sub>4</sub> -3/CC | 4.70:10.96:18.62                  | 1.03:2.11:3.82                    | 1:2.05:3.71                                                          |

**Table S2.** Comparison of HERR performances of NiCo<sub>2</sub>S<sub>4</sub>-2/CC with previously reported non-precious metal HER electrocatalysts.

| Catalyst                                                               | Substrate        | Electrolyte | J<br>(mA cm <sup>-2</sup> ) | $\eta$<br>(mV vs RHE) | Ref.      |
|------------------------------------------------------------------------|------------------|-------------|-----------------------------|-----------------------|-----------|
| NiCo <sub>2</sub> S <sub>4</sub> /CC                                   | CC <sup>a</sup>  | 1M KOH      | 10                          | 150                   | This work |
| NiCo <sub>2</sub> S <sub>4</sub> /NF                                   | NF <sup>a</sup>  | 1M KOH      | 10                          | 210                   | 1         |
| NiCo <sub>2</sub> S <sub>4</sub> @NiCo <sub>2</sub> O <sub>4</sub> /NF | NF <sup>c</sup>  | 1M KOH      | 10                          | 190                   | 2         |
| NiCo <sub>2</sub> S <sub>4</sub>                                       | GCE <sup>d</sup> | 1M KOH      | 10                          | 148                   | 3         |
| NiCo <sub>2</sub> S <sub>4</sub> /NF                                   | NF               | 1M KOH      | 10                          | 169                   | 4         |
| NiCo <sub>2</sub> S <sub>4</sub> /NF                                   | NF               | 1M KOH      | 10                          | 191                   | 5         |
| NiCo <sub>2</sub> S <sub>4</sub> @Pd                                   | GCE              | 1M KOH      | 10                          | 87                    | 6         |
| N-NiCo <sub>2</sub> S <sub>4</sub>                                     | NF               | 1M KOH      | 10                          | 41                    | 7         |
| Ni-Co-S-P/Graphene                                                     | GCE              | 1M KOH      | 10                          | 117                   | 8         |
| Co <sub>9</sub> S <sub>8</sub> -Ni <sub>x</sub> S <sub>y</sub> /NF     | NF               | 1M KOH      | 10                          | 163                   | 9         |
| MoS <sub>2</sub> -Ni <sub>x</sub> S <sub>y</sub> /NF                   | CFP <sup>e</sup> | 1M KOH      | 10                          | 139                   | 10        |
| Co <sub>9</sub> S <sub>8</sub> -NiCo <sub>2</sub> S <sub>4</sub>       | GCE              | 1M KOH      | 10                          | 172                   | 11        |
| NiCoS@C-dot                                                            | GCE              | 1M KOH      | 10                          | 232                   | 12        |
| CoS@Ni <sub>3</sub> S <sub>2</sub>                                     | NF               | 1M KOH      | 10                          | 204                   | 13        |
| Ni <sub>2</sub> P/Ni <sub>3</sub> S <sub>2</sub>                       | NF               | 1M KOH      | 10                          | 130                   | 14        |
| MoS <sub>2</sub>                                                       | RDE <sup>f</sup> | 1M KOH      | 10                          | 154                   | 15        |
| CoS <sub>2</sub>                                                       | GCE              | 1M KOH      | 10                          | 193                   | 16        |
| N-Ni <sub>3</sub> S <sub>2</sub> /NF                                   | NF               | 1M KOH      | 10                          | 155                   | 17        |
| Se-(NiCo)S <sub>x</sub> /(OH) <sub>x</sub>                             | NF               | 1M KOH      | 10                          | 103                   | 18        |
| CoP                                                                    | GCE              | 1M KOH      | 10                          | 154                   | 19        |
| rGO@NiMnCo                                                             | GCE              | 1M KOH      | 10                          | 151                   | 20        |

CC<sup>a</sup>: Carbon Cloth

NF<sup>b</sup>: Ni Foam

GCE<sup>c</sup>: Glassy Carbon Electrode

CFP<sup>d</sup>: Carbon Fiber Paper

RDE<sup>f</sup> : Rotating Disk Electrode



## References

1. A. Sivanantham, P. Ganesan, and S. Shanmugam, *Adv. Funct. Mater.*, 2016, **26**, 4661-4672.
2. X. Du, W. Lian, and X. Zhang, *Int. J. Hydrogen Energy*, 2018, **43**, 20627-20635.
3. C. Zequine, S. Bhoyate, K. Siam, P. K. Kahol, N. Kostoglou, C. Mitterer, S. J. Hinder, M. A. Baker, G. Constantinides, C. Rebholz, G. Gupta, X. Li, and R. K. Gupta, *Surf. Coat. Technol.*, 2018, **354**, 306-312.
4. J. Yu, C. Lv, L. Zhao, L. Zhang, Z. Wang, and Q. Liu, *Adv. Mater. Interface*, 2018, **5**, 1701396.
5. Y. Gong, Y. Lin, Z. Yang, J. Wang, H. Pan, Z. Xu, and Y. Liu, *ChemistrySelect*, 2019, **4**, 1180-1187.
6. G. Sheng, J. Chen, Y. Li, H. Ye, Z. Hu, X. Z. Fu, R. Sun, W. Huang, and C. P. Wong, *ACS Appl Mater Interfaces*, 2018, **10**, 22248-22256.
7. Y. Wu, X. Liu, D. Han, X. Song, L. Shi, Y. Song, S. Niu, Y. Xie, J. Cai, S. Wu, J. Kang, J. Zhou, Z. Chen, X. Zheng, X. Xiao, and G. Wang, *Nat Commun*, 2018, **9**, 1425.
8. H. J. Song, H. Yoon, B. Ju, G.-H. Lee, and D.-W. Kim, *Adv. Energy Mater*, 2018, **8**, 1802319.
9. D. Ansovini, C. J. Jun Lee, C. S. Chua, L. T. Ong, H. R. Tan, W. R. Webb, R. Raja, and Y.-F. Lim, *J. Mater. Chem. A*, 2016, **4**, 9744-9749.
10. L. Sun, T. Wang, L. Zhang, Y. Sun, K. Xu, Z. Dai, and F. Ma, *J. Power Sources*, 2018, **377**, 142-150.
11. M. Basu, *Chem. Asian J.*, 2018, **13**, 3204-3211.
12. Y. Ali, V.-T. Nguyen, N.-A. Nguyen, S. Shin, and H.-S. Choi, *Int. J. Hydrogen Energy*, 2019, **44**, 8214-8222.
13. S. Shit, S. Chhetri, W. Jang, N. C. Murmu, H. Koo, P. Samanta, and T. Kuila, *ACS Appl. Mater Interfaces*, 2018, **10**, 27712-27722.
14. L. Zeng, K. Sun, X. Wang, Y. Liu, Y. Pan, Z. Liu, D. Cao, Y. Song, S. Liu, and C. Liu, *Nano Energy*, 2018, **51**, 26-36.
15. Y. Yin, J. Han, Y. Zhang, X. Zhang, P. Xu, Q. Yuan, L. Samad, X. Wang, Y. Wang, Z. Zhang, P. Zhang, X. Cao, B. Song, and S. Jin, *J. Am. Chem. Soc.*, 2016, **138**, 7965-7972.
16. X. Ma, W. Zhang, Y. Deng, C. Zhong, W. Hu, and X. Han, *Nanoscale*, 2018, **10**, 4816-4824.
17. T. Kou, T. Smart, B. Yao, I. Chen, D. Thota, Y. Ping, and Y. Li, *Adv. Energy Mater.*, 2018, **8**, 1703538.
18. C. Hu, L. Zhang, Z. J. Zhao, A. Li, X. Chang, and J. Gong, *Adv. Mater.*, 2018, **30**, e1705538.
19. H. Li, X. Zhao, H. Liu, S. Chen, X. Yang, C. Lv, H. Zhang, X. She, and D. Yang, *Small*, 2018, **14**, e1802824.
20. R. Miao, J. He, S. Sahoo, Z. Luo, W. Zhong, S.-Y. Chen, C. Guild, T. Jafari, B. Dutta, S. A. Cetegen, M. Wang, S. P. Alpay, and S. L. Suib, *ACS Catal.*, 2016, **7**, 819-832.
